# Supplementary material for: A highly selective and sensitive fluorescent chemosensor for Hg2+ based on a pyridine-appended π-conjugated ligand
Source: Royal Society of Chemistry journal article supplement (doi:10.1039/c4ra07448c), 2014-01-01
Supplement: c4ra07448c1.pdf [file c4ra07448c1.pdf]

## **A highly selective and sensitive fluorescent chemosensor for Hg<sup>2+</sup> based on a pyridine-appended $\pi$ -conjugated ligand**

Yaping Yang,<sup>a</sup> Xin-Long Ni,<sup>a\*</sup> Tao Sun,<sup>a</sup> Hang Cong<sup>a</sup> and Gang Wei<sup>b</sup>

<sup>a</sup> Key Laboratory of Macrocyclic and Supramolecular Chemistry of Guizhou Province, Guizhou University, Guiyang 550025, China

<sup>b</sup> CSIRO Manufacturing Flagship PO Box 218, Lindfield, NSW 2070, Australia.

E-mail: longni333@163.com.

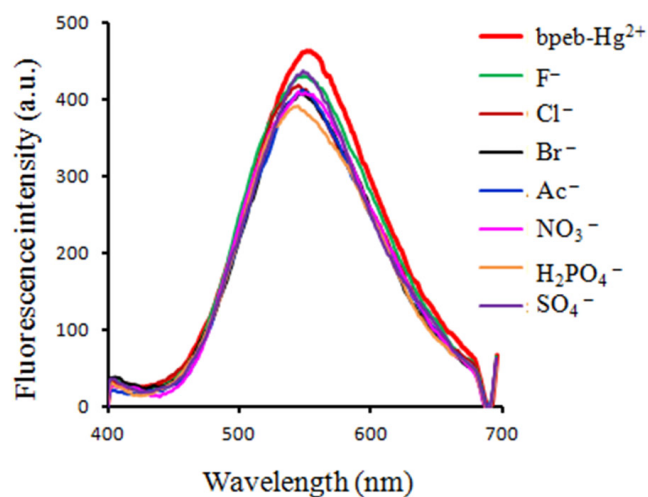

**Figure S1.** Fluorescence response of **bpeb** (10  $\mu\text{M}$ ) with  $\text{Hg}^{2+}$  (50  $\mu\text{M}$ ) in aqueous solution buffered with HEPES (10 mM, pH 7.4) to 50  $\mu\text{M}$  different tested anions as their tetrabutylammonium (TBA) salts at 298 K.  $\lambda_{\text{ex}} = 360$  nm.

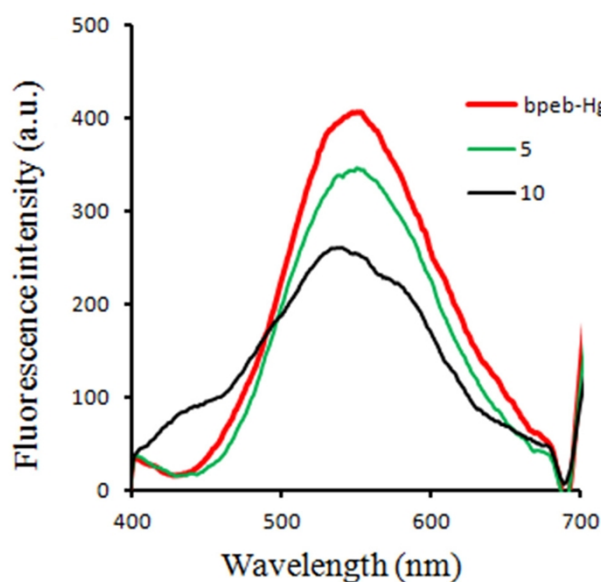

**Figure S2.** Fluorescence spectra of **bpeb**- $\text{Hg}^{2+}$  upon addition of increasing concentrations of EDTA (5 and 10 equiv.) in aqueous solution buffered with HEPES (10 mM, pH 7.4).  $\lambda_{\text{ex}} = 360$  nm.

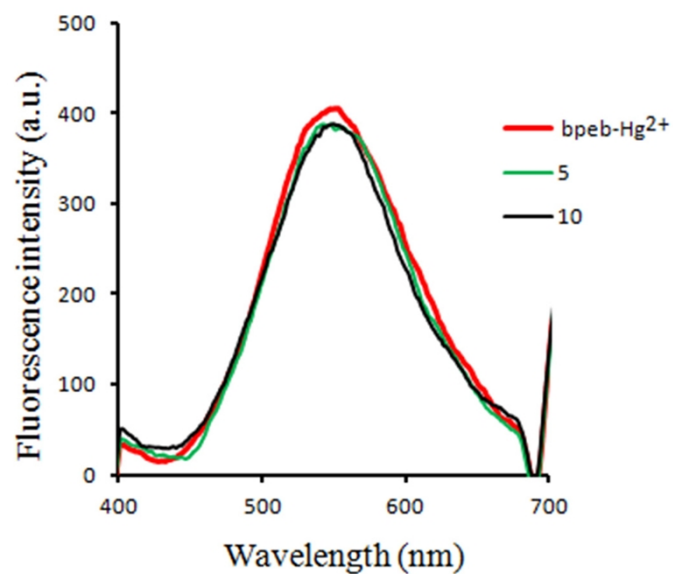

**Figure S3.** Fluorescence spectra of **bpeb**-Hg<sup>2+</sup> upon addition of increasing concentrations of Cys (5 and 10 equiv.) in aqueous solution buffered with HEPES (10 mM, pH 7.4).  $\lambda_{\text{ex}} = 360$  nm.

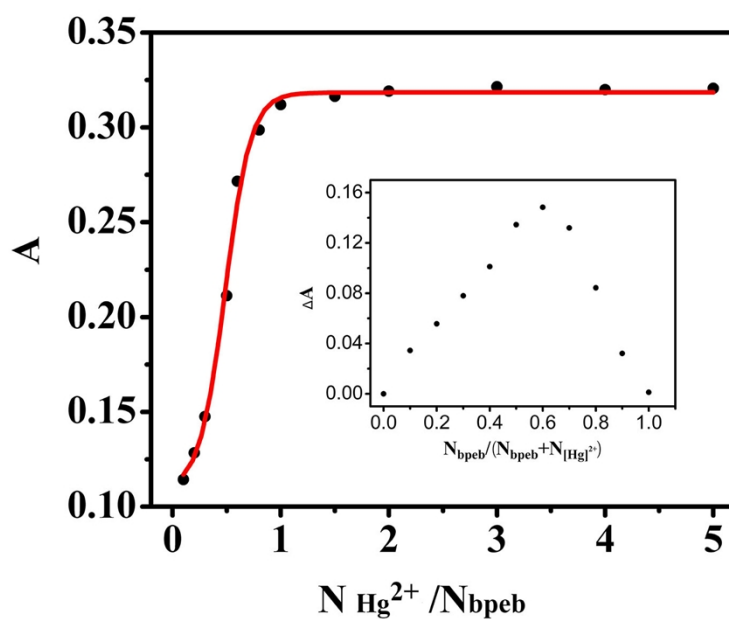

**Figure S4.**  $N_{[\text{Hg}^{2+}]} / N_{\text{bpeb}}$  curve and Job's plot showing the 2:1 binding of **bpeb** to Hg<sup>2+</sup>.

### MTT cell viability assay

PC3 cells were plated overnight on 96-well plates at 50000 cells per well in growth medium. After seeding, cells were maintained in growth media treated at increasing concentrations (2.5  $\mu$ M, 5  $\mu$ M, 10  $\mu$ M, 20  $\mu$ M and 30  $\mu$ M) of **bpeb** (dissolved in DMSO, final concentration) for 24 h. The MTT cytotoxicity assay was performed by adding 15  $\mu$ L of an MTT (5 mg/mL) solution to each well at 37  $^{\circ}$ C and incubating for 3-4 h. The MTT-containing media were discarded and 200  $\mu$ L of DMSO was added to each well. The absorbance of each well was measured on a Thermo MK3 microplate reader at 490 nm. The optical density of the result in MTT assay was directly proportional to the number of viable cells.

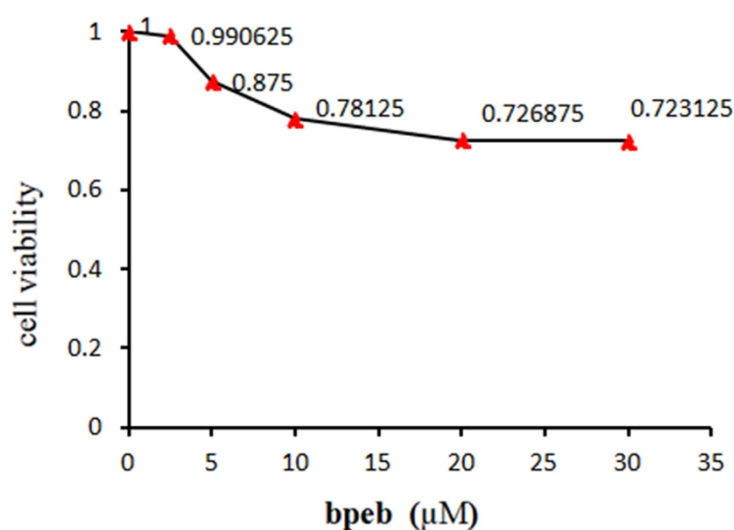

**Figure S5.** PC3 cell viability in the presence of **bpeb** with varying concentrations measured by MTT.
